# Supplementary material for: Utilization of spontaneous breathing trial, objective cough test, and diaphragmatic ultrasound results to predict extubation success: COBRE-US trial
Source: PubMed Central journal article supplement (PMC10617213; doi:10.1186/s13054-023-04708-y), 2023-10-31
Supplement: 13054_2023_4708_MOESM1_ESM.pdf [file 13054_2023_4708_MOESM1_ESM.pdf]

**Supplementary appendix.** Univariate analysis for predictors of a successful spontaneous breathing trial.

**Objective measurement of cough**

| OBS | Area | Std. Err | 95% conf. Interval |
|-----|------|----------|--------------------|
| 451 | 0.58 | 0.03     | 0.52 - 0.64        |

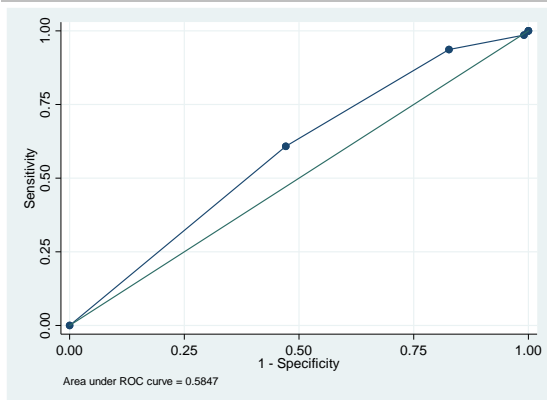

p = 0.002

OR 1.74 95%CI 1.12 – 2.70; P = 0.015

**Velocity of diaphragmatic contraction (VDC)**

| OBS | Area | Std. Err | 95% conf. interval |
|-----|------|----------|--------------------|
| 391 | 0.55 | 0.03     | 0.49 0.62          |

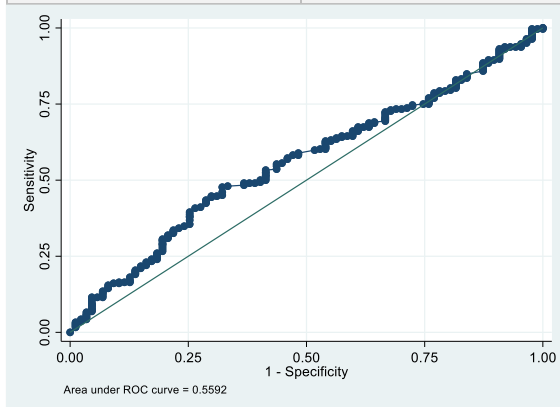

p = 0.04

OR 0.52 95%CI 0.31 – 0.86; P = 0.011

### Duration of the diaphragmatic cycle

| OBS | Area | Std. Err | 95% conf. Interval |
|-----|------|----------|--------------------|
| 386 | 0.57 | 0.03     | 0.50 0.64          |

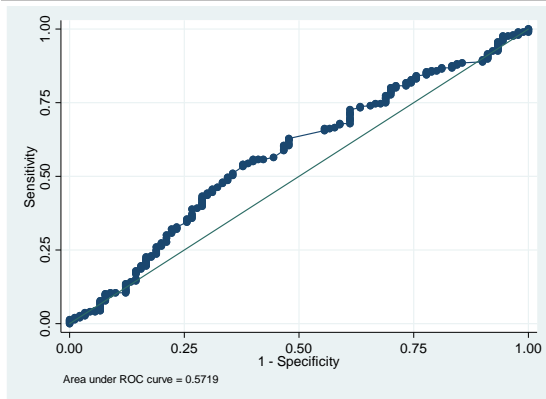

p = 0.019

OR 1.94 95%CI 1.19 – 3.14; P = 0.008

### Leak test:

| OBS | Area | Std. Err | 95% conf. Interval |
|-----|------|----------|--------------------|
| 444 | 0.51 | 0.01     | 0.49 - 0.54        |

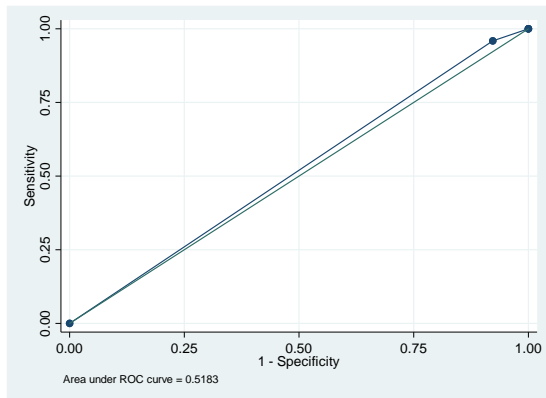

p = 0.100

The AUC-ROC was 0.51 with a confidence interval spanning the null value (0.5) and a non-significant difference from 0.5 (p = 0.100). This indicates that the leak test lacks discriminative capacity to predict success in the spontaneous breathing trial.

### Rapid and shallow breathing index (RSBI):

| OBS | Area | Std. Err | 95% conf. Interval |
|-----|------|----------|--------------------|
| 447 | 0.53 | 0.03     | 0.46 - 0.59        |

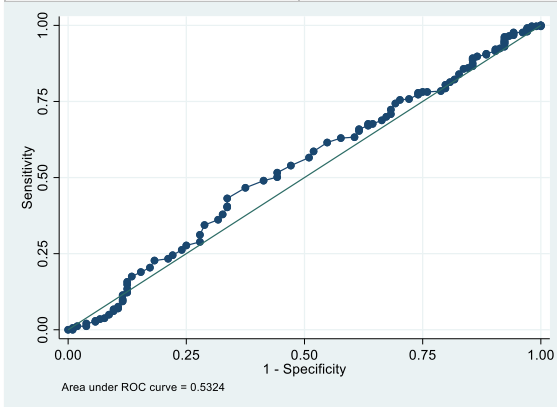

**p = 0.161**

The AUC-ROC was 0.53 with a confidence interval spanning the null value (0.5) and a non-significant difference from 0.5 ( $p = 0.161$ ). This indicates that the RSBI lacks discriminative capacity to predict success in the spontaneous breathing trial.

### Inspiratory total time:

| OBS | Area | Std. Err | 95% conf. Interval |
|-----|------|----------|--------------------|
| 410 | 0.55 | 0.03     | 0.48 0.62          |

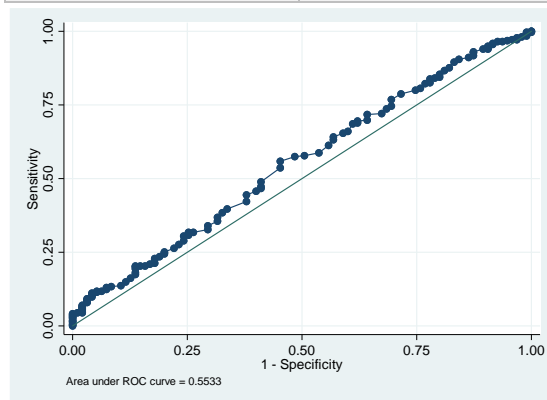

**p = 0.057**

The AUC-ROC was 0.55 with a confidence interval spanning the null value (0.5) and a non-significant difference from 0.5 ( $p = 0.057$ ). This indicates that the inspiratory total time lacks discriminative capacity to predict success in the spontaneous breathing trial.

### Diaphragmatic excursion

| OBS | Area | Std. Err | 95% conf. Interval |
|-----|------|----------|--------------------|
| 418 | 0.48 | 0.03     | 0.41 - 0.54        |

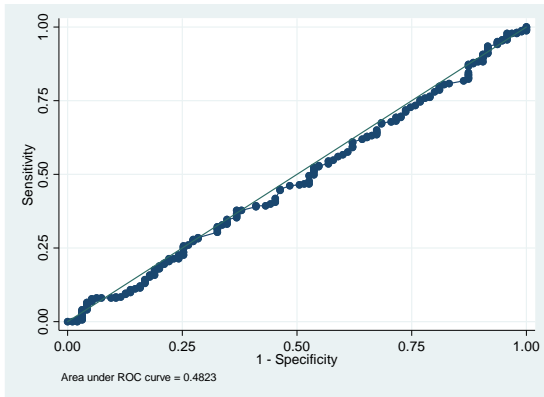

$p = 0.300$

The AUC-ROC was 0.48 with a confidence interval spanning the null value (0.5) and a non-significant difference from 0.5 ( $p = 0.300$ ). This indicates that the diaphragmatic excursion lacks discriminative capacity to predict success in the spontaneous breathing trial.

### Diaphragmatic thickening index

| OBS | Area | Std. Err | 95% conf. interval |
|-----|------|----------|--------------------|
| 353 | 0.51 | 0.03     | 0.43 0.58          |

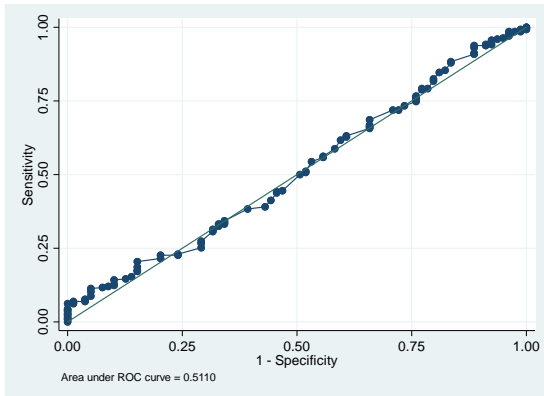

$p = 0.384$

The AUC-ROC was 0.51 with a confidence interval spanning the null value (0.5) and a non-significant difference from 0.5 ( $p = 0.384$ ). This indicates that the diaphragmatic thickening index lacks discriminative capacity to predict success in the spontaneous breathing trial.

**Supplementary file 1b.** univariate analysis for predictors of a successful extubation

**Spontaneous breathing trial (SBT)**

| OBS | Area | Std. Err | 95% conf. Interval |
|-----|------|----------|--------------------|
| 456 | 0.86 | 0.019    | 0.82 0.89          |

p < 0.001

OR 167.0 95%CI 64.0 – 436.0; P < 0.001

**Objective measurement of cough**

| OBS | Area | Std. Err | 95% conf. Interval |
|-----|------|----------|--------------------|
| 451 | 0.61 | 0.02     | 0.56 0.66          |

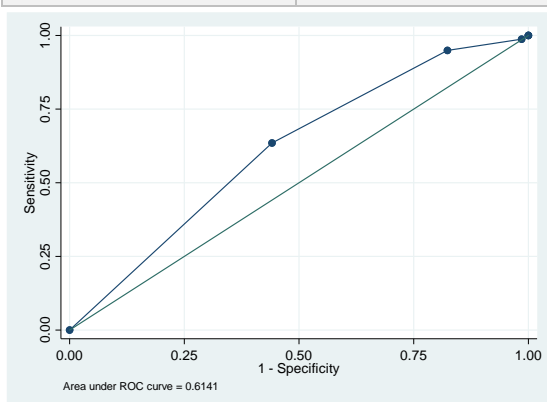

p < 0.001

OR 1.90 95%CI 1.43 – 2.54; P < 0.001

### Velocity of diaphragmatic contraction (VDC)

| OBS | Area | Std. Err | 95% conf. interval |
|-----|------|----------|--------------------|
| 391 | 0.58 | 0.03     | 0.52 - 0.64        |

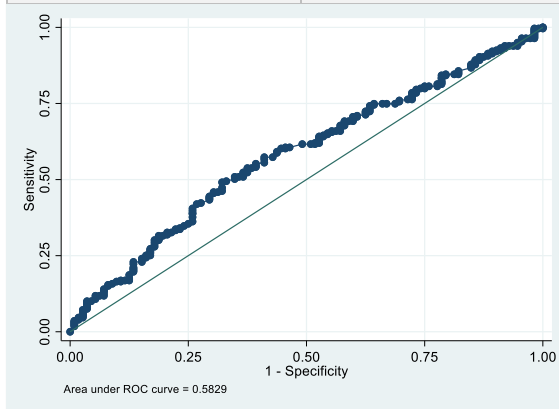

$p = 0.004$

OR 0.85 95%CI 0.73 – 0.99; P = 0.04

### Leak test:

| OBS | Area | Std. Err | 95% conf. Interval |
|-----|------|----------|--------------------|
| 441 | 0.56 | 0.03     | 0.50 - 0.62        |

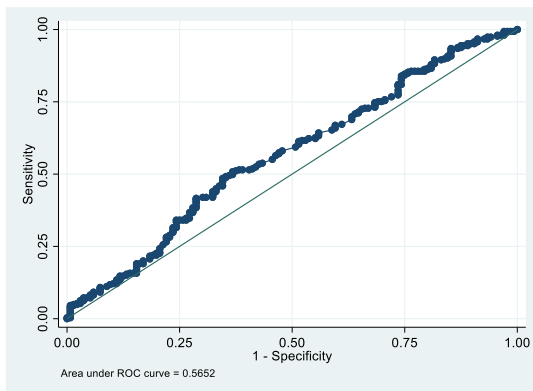

$p = 0.014$

OR 1.002 95%CI 1.0004 – 1.004; P = 0.02

### Inspiratory total time:

| OBS | Area | Std. Err | 95% conf. interval |
|-----|------|----------|--------------------|
| 410 | 0.57 | 0.03     | 0.51 - 0.63        |

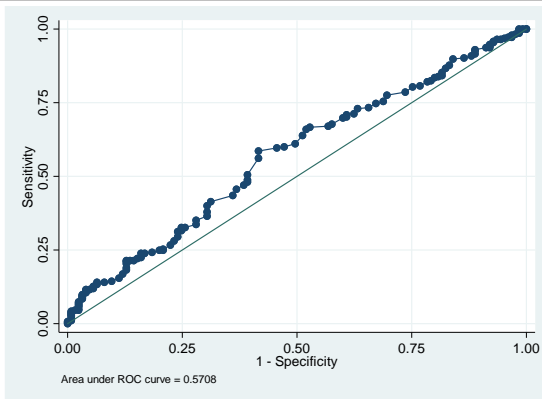

$p = 0.010$

OR 2.10 95%CI 1.14 – 3.87;  $P = 0.02$

### Rapid and shallow breathing index (RSBI):

| OBS | Area | Std. Err | 95% conf. Interval |
|-----|------|----------|--------------------|
| 447 | 0.48 | 0.03     | 0.42 - 0.54        |

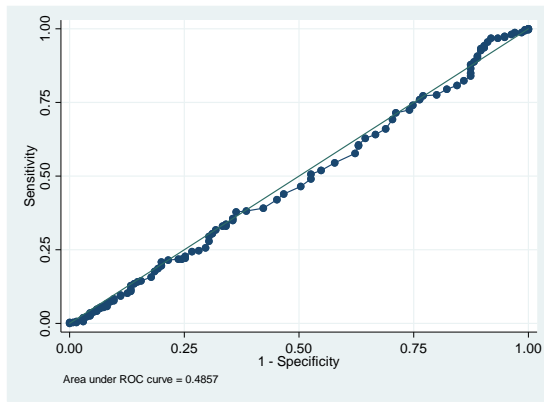

$p = 0.317$

The AUC-ROC was 0.48 with a confidence interval spanning the null value (0.5) and a non-significant difference from 0.5 ( $p = 0.317$ ). This indicates that the RSBI lacks discriminative capacity to predict success in the extubation.

### Diaphragmatic excursion

| OBS | Area | Std. Err | 95% conf. interval |
|-----|------|----------|--------------------|
| 418 | 0.53 | 0.03     | 0.46 - 0.59        |

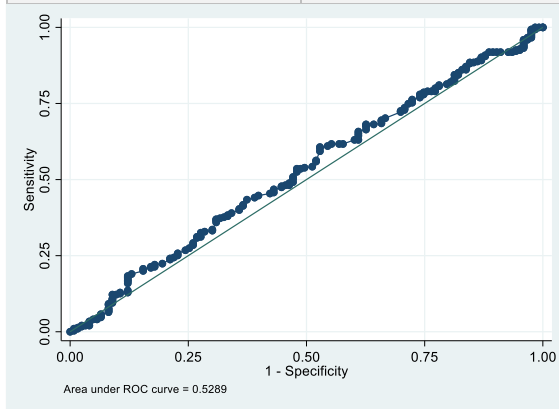

p = 0.176

The AUC-ROC was 0.53 with a confidence interval spanning the null value (0.5) and a non-significant difference from 0.5 (p = 0.176). This indicates that the diaphragmatic excursion lacks discriminative capacity to predict success in the extubation.

### Duration of the diaphragmatic cycle

| OBS | Area | Std. Err | 95% conf. interval |
|-----|------|----------|--------------------|
| 386 | 0.53 | 0.03     | 0.47 - 0.60        |

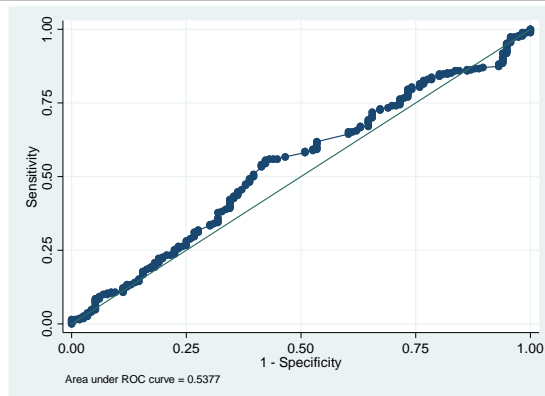

p = 0.120

The AUC-ROC was 0.53 with a confidence interval spanning the null value (0.5) and a non-significant difference from 0.5 (p = 0.120). This indicates that the duration of the diaphragmatic cycle lacks discriminative capacity to predict success in the extubation.



### Diaphragmatic thickening index

| OBS | Area | Std. Err | 95% conf. interval |
|-----|------|----------|--------------------|
| 353 | 0.53 | 0.03     | 0.46 - 0.60        |

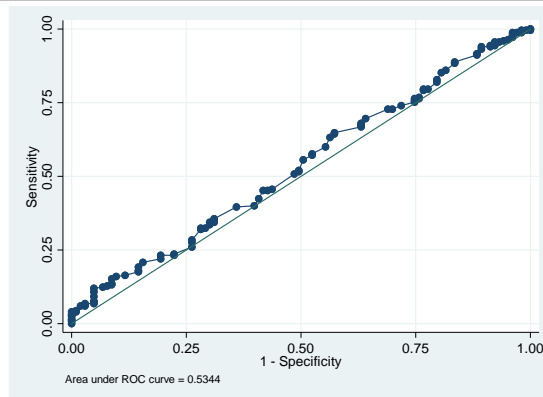

$p = 0.384$

The AUC-ROC was 0.53 with a confidence interval spanning the null value (0.5) and a non-significant difference from 0.5 ( $p = 0.384$ ). This indicates that the diaphragmatic thickening index lacks discriminative capacity to predict success in the extubation.

**Supplementary appendix.** Interaction analysis.

**Supplementary table 2a.** Spontaneous breathing trial parsimonious model

| SBT   | Coef.  | Std Err. | z      | P>z    | 95% CI |        |
|-------|--------|----------|--------|--------|--------|--------|
| OMC   | 0.519  | 0.063    | 8.220  | <0.001 | 0.395  | 0.643  |
| VDC   | -0.123 | 0.031    | -3.960 | <0.001 | -0.184 | -0.062 |
| _cons | 0.304  | 0.171    | 1.780  | 0.075  | -0.031 | 0.639  |

Notes: SBT: Spontaneous breathing trial; OMC: Objective measurement of cough; VDC: Velocity of diaphragmatic contraction.

\*R<sup>2</sup>: 0.03

**Supplementary table 2b.** SBT model with the interaction variable

| SBT       | Coef.  | Std. Err. | z      | P> z   | 95% CI |       |
|-----------|--------|-----------|--------|--------|--------|-------|
| OMC       | 0.625  | 0.119     | 5.280  | <0.001 | 0.393  | 0.857 |
| VDC       | -0.027 | 0.096     | -0.280 | 0.782  | -0.216 | 0.162 |
| OMC x VDC | -0.040 | 0.038     | -1.060 | 0.289  | -0.115 | 0.034 |
| _cons     | 0.054  | 0.291     | 0.190  | 0.852  | -0.515 | 0.624 |

Notes: SBT: Spontaneous breathing trial; OMC: Objective measurement of cough; VDC: Velocity of diaphragmatic contraction.

\*R<sup>2</sup>: 0.03

The interaction variable (Cough x Velocity of diaphragmatic contraction) was not significantly associated with SBT and did not improve R<sup>2</sup> the of the model.

**Supplementary table 2c.** Evaluation of collinearity in the SBT predictor model with the interaction variable

| Variable  | VIF   | SQRT VIF | Tolerance | R-Squared |
|-----------|-------|----------|-----------|-----------|
| OMC       | 3.58  | 1.89     | 0.279     | 0.720     |
| VDC       | 12    | 3.46     | 0.083     | 0.916     |
| OMC x VDC | 15.13 | 3.89     | 0.066     | 0.933     |

Notes: VIF: variance inflation factor; SQRT VIF: The square root of variance inflation factor; OMC: Objective measurement of cough; VDC: Velocity of diaphragmatic contraction.

\*The variance inflation factor was 15.13 and the tolerance 0.066, indicating collinearity induced by the interaction variable.

As the interaction variable (Cough x Velocity of diaphragmatic contraction) was not significantly associated with SBT, did not improve the R<sup>2</sup> of the model and induced collinearity, this variable was not introduced in the final model.

**Supplementary table 2d.** Successful extubation parsimonious model

| Successful extubation | Coef.  | Std. Err. | Z      | P>z    | 95% CI |        |
|-----------------------|--------|-----------|--------|--------|--------|--------|
| SBT                   | 5.646  | 0.254     | 22.18  | <0.001 | 5.147  | 6.145  |
| OMC                   | 0.745  | 0.090     | 8.21   | <0.001 | 0.567  | 0.923  |
| VDC                   | -0.220 | 0.045     | -4.87  | <0.001 | -0.309 | -0.131 |
| _cons                 | -4.692 | 0.346     | -13.55 | <0.001 | -5.371 | -4.014 |

Notes: SBT: Spontaneous breathing trial; OMC: Objective measurement of cough; VDC: Velocity of diaphragmatic contraction.

R<sup>2</sup>: 0.55

**Supplementary table 2e.** Successful extubation predictor Model with the interaction variables

| successful extubation | Coef.  | Std. Err. | z      | P>z    | [95% Conf. |        |
|-----------------------|--------|-----------|--------|--------|------------|--------|
| SBT                   | 4.718  | 0.528     | 8.930  | <0.001 | 3.683      | 5.754  |
| OMC                   | 0.606  | 0.171     | 3.560  | <0.001 | 0.272      | 0.941  |
| VDC                   | -0.734 | 0.261     | -2.810 | 0.005  | -1.247     | -0.222 |
| OMC x VDC             | 0.051  | 0.054     | 0.970  | 0.334  | -0.053     | 0.157  |
| VDC x SBT             | 0.413  | 0.229     | 1.800  | 0.071  | -0.036     | 0.862  |
| _cons                 | -3.503 | 0.654     | -5.350 | <0.001 | -4.786     | -2.221 |

Notes: SBT: Spontaneous breathing trial; OMC: Objective measurement of cough; VDC: Velocity of diaphragmatic contraction.

R<sup>2</sup>: 0.55

The interaction variables (OMC x VDC and VDC x SBT) were not significantly associated

with a successful extubation and did not improve R<sup>2</sup> the of the model

**Supplementary table 2f.** Evaluation of collinearity in the successful extubation predictor model with the interaction variables

| Variable  | VIF    | SQRT VIF | Tolerance | R-Squared |
|-----------|--------|----------|-----------|-----------|
| SBT       | 4.350  | 2.090    | 0.230     | 0.770     |
| OMC       | 3.700  | 1.920    | 0.271     | 0.730     |
| VDC       | 13.580 | 3.680    | 0.074     | 0.926     |
| OMC x VDC | 15.520 | 3.940    | 0.065     | 0.936     |
| VDC x SBT | 7.040  | 2.650    | 0.142     | 0.858     |

Notes: VIF: variance inflation factor; SQRT VIF: The square root of variance inflation factor; SBT: Spontaneous breathing trial; OMC: Objective measurement of cough; VDC: Velocity of diaphragmatic contraction.

\*The variance inflation factor was  $> 7$  and the tolerance  $< 0.15$  for the interaction variables, indicating collinearity induced by the interaction variables.

As the interaction variables (OMC x VDC and VDC x SBT) were not significantly associated with SBT, did not improve the  $R^2$  of the model, and induced collinearity, these variables were not introduced in the final model.

**Supplementary appendix.** Collinearity analysis.

**Supplementary table 3a.** Spontaneous breathing trial predictor model, collinearity analysis.

| Variable | VIF   | SQRT VIF | Tolerance | R-Squared |
|----------|-------|----------|-----------|-----------|
| OMC      | 1.000 | 1.000    | 0.997     | 0.003     |
| VDC      | 1.000 | 1.000    | 0.997     | 0.003     |

Notes: VIF: variance inflation factor; SQRT VIF: The square root of variance inflation factor; OMC: Objective measurement of cough; VDC: Velocity of diaphragmatic contraction.

\*The variance inflation factor was 1 and the tolerance 0.99, indicating absence of collinearity

**Supplementary table 3b.** successful extubation predictor model, collinearity analysis.

| Variable | VIF   | SQRT VIF | Tolerance | R-Squared |
|----------|-------|----------|-----------|-----------|
| SBT      | 1.030 | 1.020    | 0.968     | 0.032     |
| OMC      | 1.030 | 1.020    | 0.970     | 0.030     |
| VDC      | 1.010 | 1.000    | 0.991     | 0.009     |

Notes: VIF: variance inflation factor; SQRT VIF: The square root of variance inflation factor; SBT: Spontaneous breathing trial; OMC: Objective measurement of cough; VDC: Velocity of diaphragmatic contraction.

\*The highest variance inflation factor was 1.03 and the lowest tolerance 0.96, indicating absence of collinearity
